# Supplementary material
Source: Springer Nature journal article supplement (https://www.springermedizin.de/resource/supplementary/12916_2012_582_MOESM5_ESM.pdf/9598194)

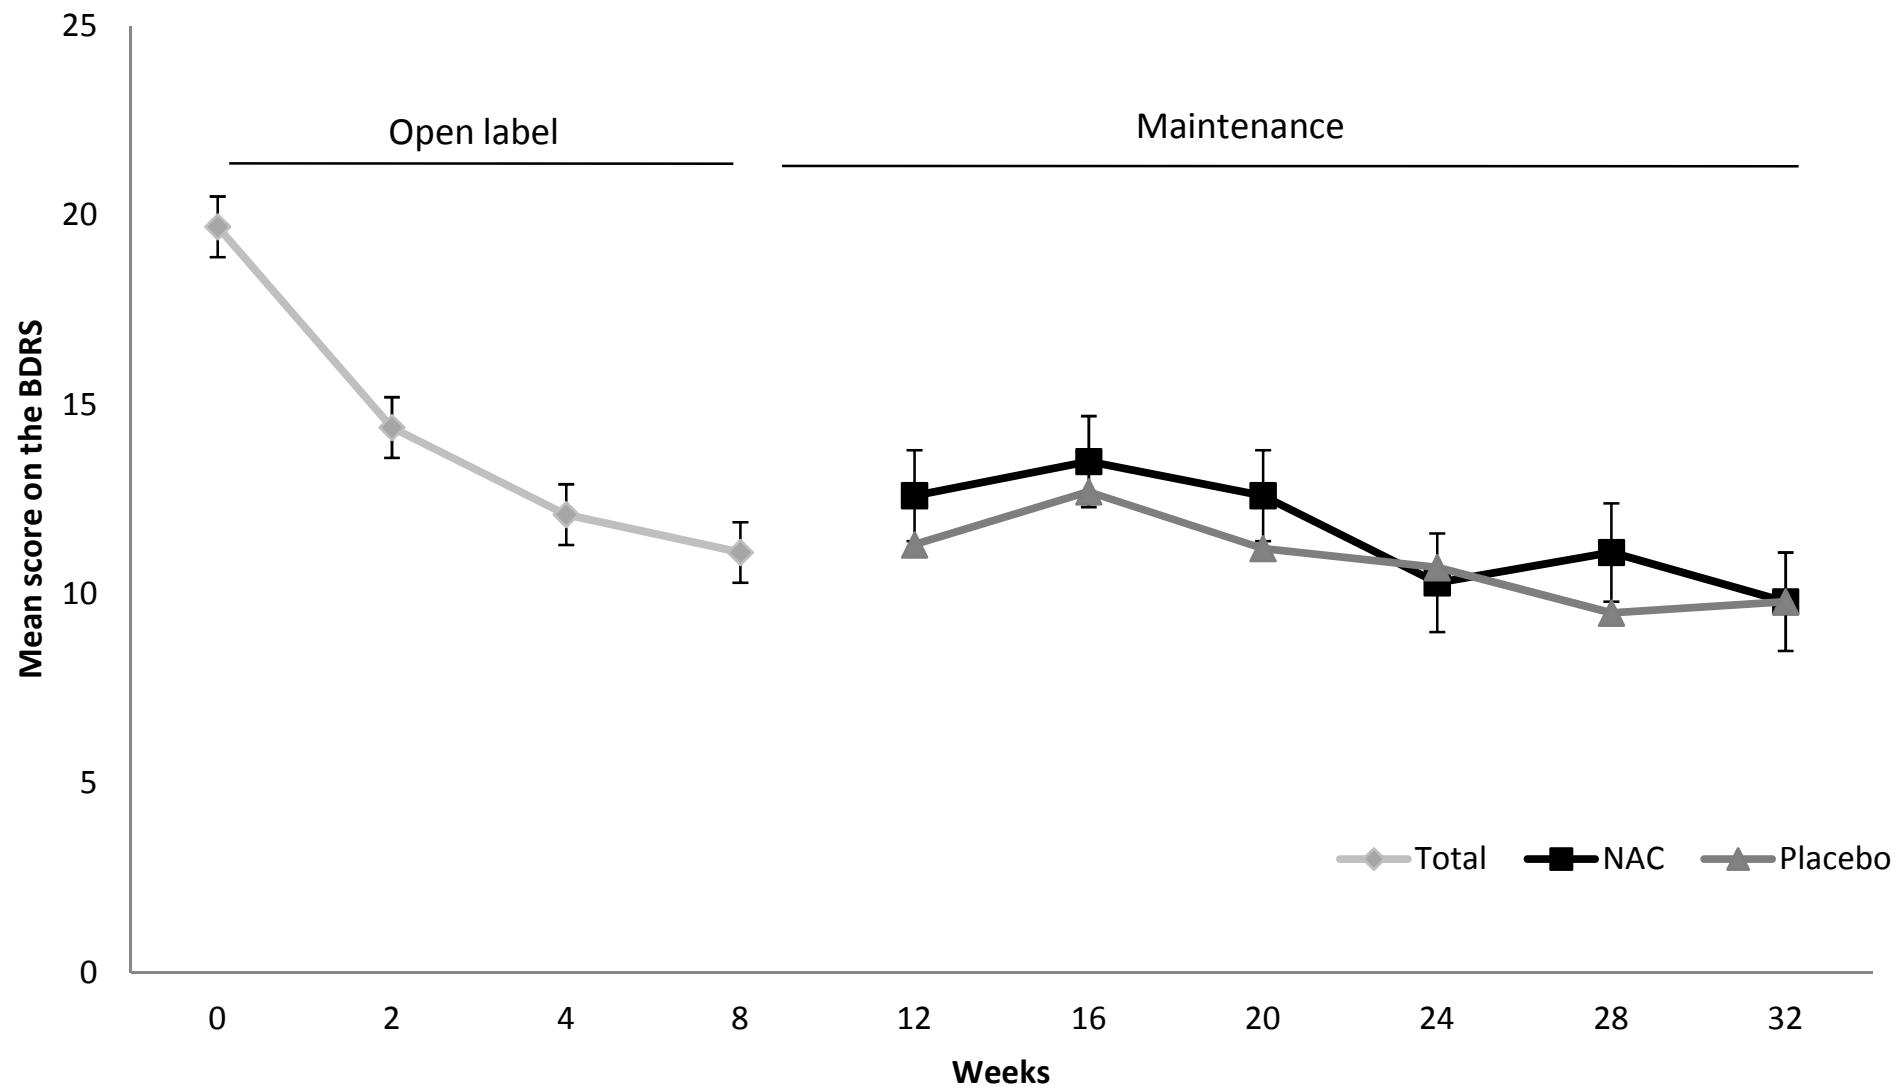

Supplement: MOESM5 [file 9598194]
